# Supplementary material
Source: publisher figshare collection journal article supplement (https://frontiersin.figshare.com/ndownloader/files/20774181)
Supplement: Supplementary file 1 [file 20774181]

**Supplementary Material**

SITE SUITABILITY FOR FINFISH MARINE AQUACULTURE IN THE CENTRAL MEDITERRANEAN SEA

Porporato E. M. D.1*, Pastres R.1,2 and Brigolin D.1,2,3

1Dipartimento di Scienze Ambientali, Informatica e Statistica, Università Ca’ Foscari Venezia, Via Torino 155, 30170 Venezia Mestre, Italy

2Bluefarm S.r.l., Marghera, Italy

3Università Iuav di Venezia, Dorsoduro 2196, 30135 Venice, Italy

**Table S1.** Factors for site suitability, data used for the analysis, spatial resolution and data source.

| **Spatial data** | **Spatial resolution** | **Source** |
| --- | --- | --- |
| SST - Sea Surface Temperature | 1 km2 | SST_MED_SST_L4_NRT_OBSERVATIONS_010_004 |
| SWH - Significant Wave Height | 4 km2 | MEDSEA_HINDCAST_WAV_006_012 |
| DH - Distance to Harbour | 1 km2 | This study |
| Impact | 1 km2 | Halpern et al., 2008; Micheli et al., 2013 |
| Bass - Days to commercial size | 1 km2 | This study |
| Bream - Days to commercial size | 1 km2 | This study |

**Figure S1.** Maps of normalized criteria considered in the analyses: (A) seabass growth; (B) seabream growth; (C) distance to harbour; (D) significant wave height; (E) cumulative impact within the study area.

**
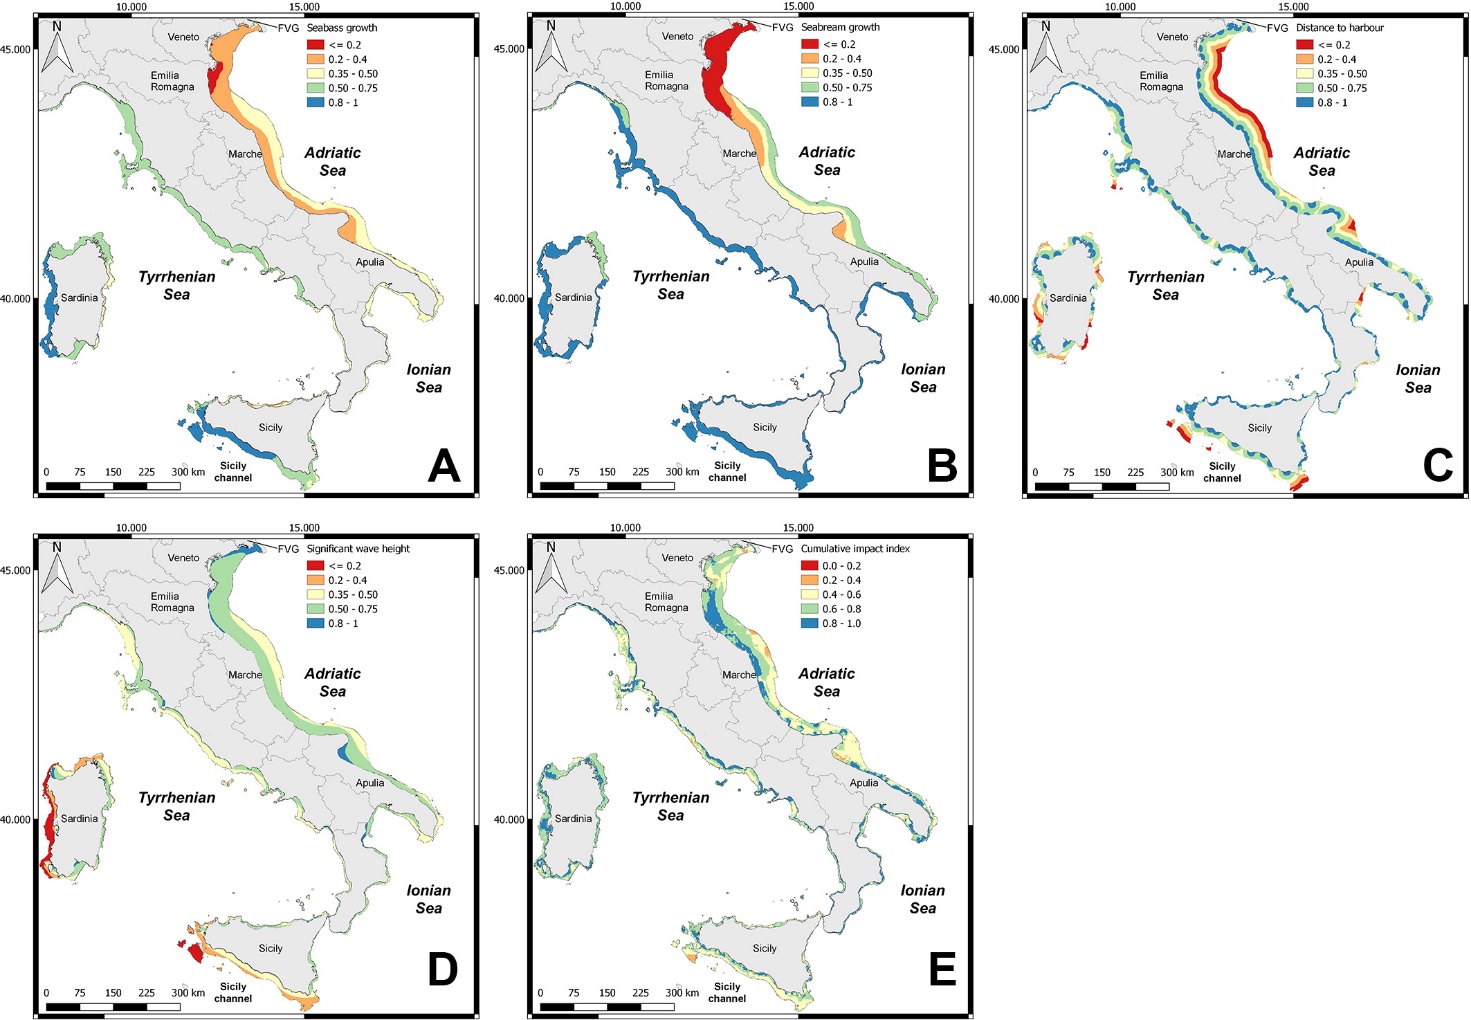
**

**Figure S2.** SMCE median results for the 3 scenarios considered: (A) Environmental, (B) Blue Growth, (C) Economic.


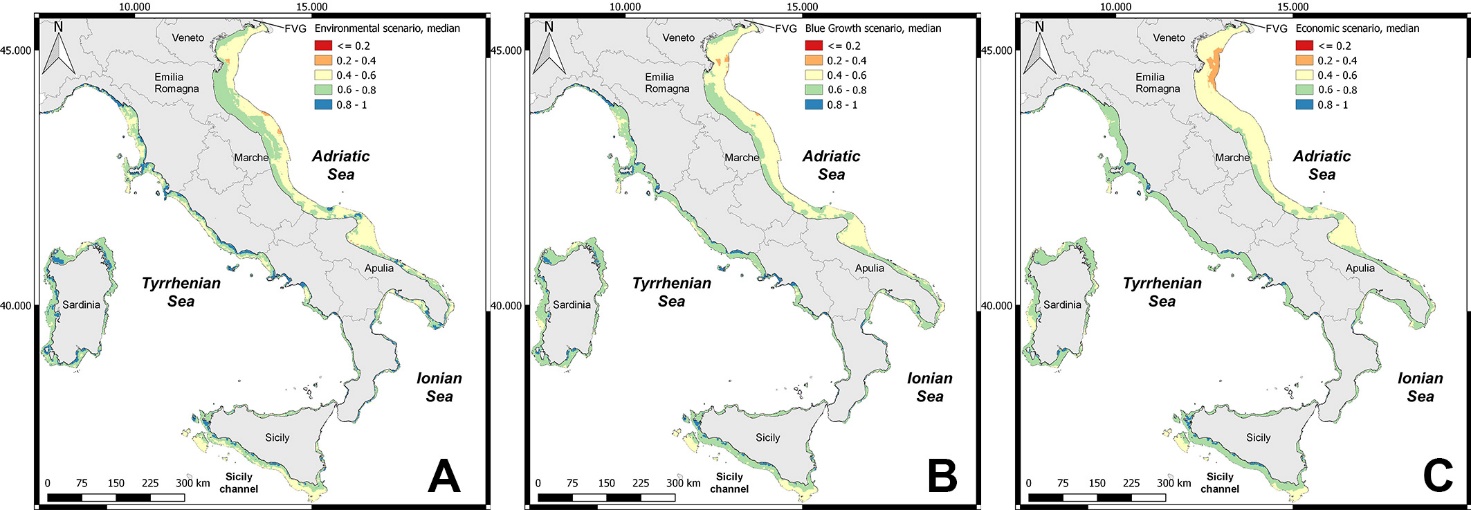


**Figure S3.** (A) Percentage of area for the 3 scenarios (Environmental, Blue Growth and Economic) within each suitability class (0.0 – 0.2, 0.2 – 0.4, 0.4 – 0.6, 0.6 – 0.8, 0.8 – 1.0). (B) Difference in available area considering the constraints.

**
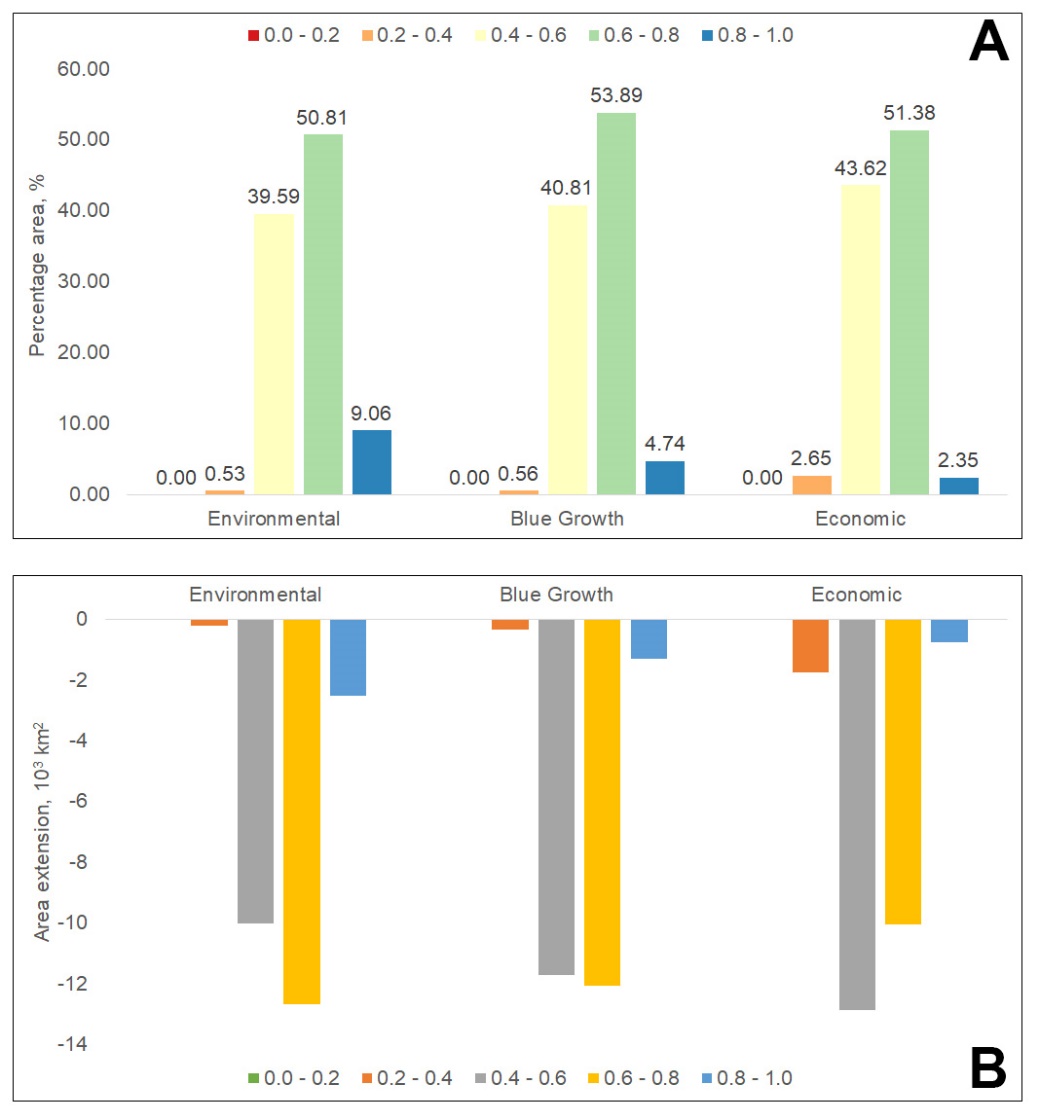
**

**Figure S4.** Area extension (103 km2) of the normalised values for the 5 criteria considered in the SMCE analysis (*i.e.*: Bass, Bream, SWH, DH and Impact). Values were clustered in 3 classes (low, medium and high).

**
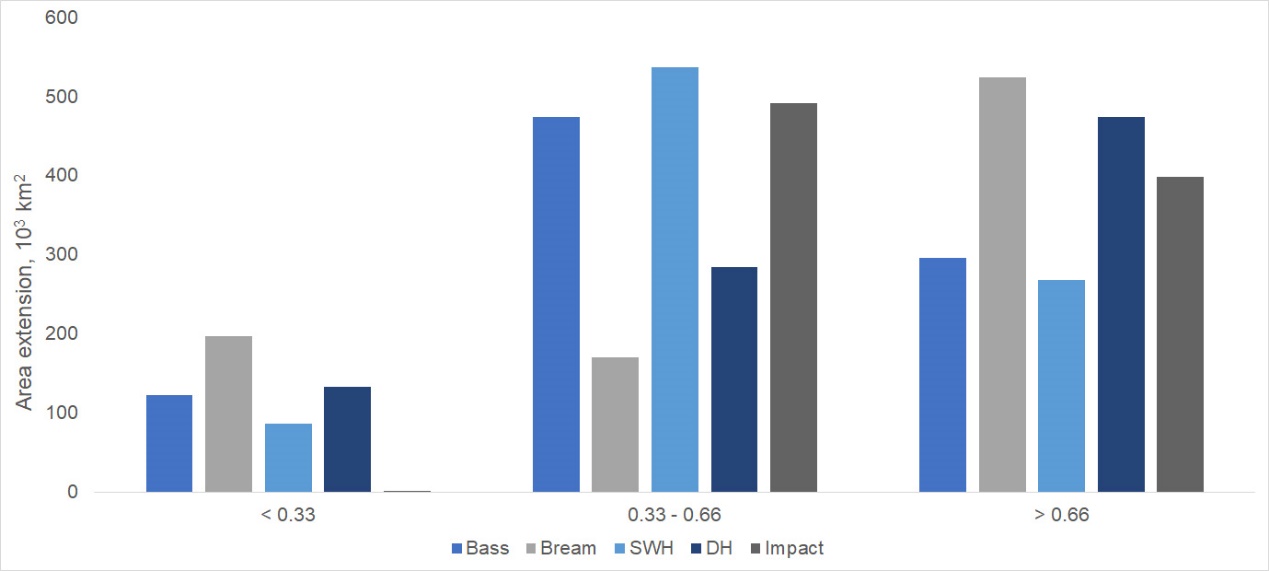
**
